# Supplementary material for: Tracing online flood conversations across borders: a watershed-level analysis of geo-social media topics during the 2021 European flood
Source: Copernicus journal article supplement (doi:10.5194/nhess-25-2351-2025), 2025-07-15
Supplement: Supplementary file 1 [file nhess-25-2351-2025-supplement.pdf]

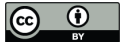

*Supplement of*

## **Tracing online flood conversations across borders: a watershed-level analysis of geo-social media topics during the 2021 European flood**

**Sébastien Dujardin et al.**

*Correspondence to:* Sébastien Dujardin ([sebastien.dujardin@unamur.be](mailto:sebastien.dujardin@unamur.be)) and Dorian Arifi ([dorian.arifi@plus.ac.at](mailto:dorian.arifi@plus.ac.at))

The copyright of individual parts of the supplement might differ from the article licence.

## Supplementary material

**Table S1. Complete list of relevant terms per each topic identified in the topic modelling.**

| Topic Abbreviation | Relevant Terms                                                                                                         | Number of Tweets |
|--------------------|------------------------------------------------------------------------------------------------------------------------|------------------|
| Topic 1            | climate, change, crisis, climatecrisis, catastrophe, protection, energy, extreme, heat, climateactionnow               | 231              |
| Topic 2            | limburg, water, maas, high, flooding, venlo, valkenburg, maastricht, watersnood, south                                 | 719              |
| Topic 3            | cologne, intensity, precipitation, area, koelle                                                                        | 46               |
| Topic 4            | towards, direction, closed, near, blocked, bastogne, li, flooding, charleroi, travel                                   | 301              |
| Topic 5            | people, affected, flood, disaster, many, victims, floods, solidarity, help, thanks                                     | 594              |
| Topic 6            | country, poland, italy, uk, people, hunger, strike, schoenstatt, schoenstattorg, srebrenica                            | 300              |
| Topic 7            | pastoral, care, emergency, koblenz, mayen, mission, landkreismayenkoblenz, deployment, districtmayenkoblenz, operation | 10               |
| Topic 8            | mh, mystery, solved, youtube, check, video, judge, answers, research, questions                                        | 16               |
| Topic 9            | ahrweiler, flood, help, germany, donations, bonn, district, ahr, fire, people                                          | 445              |
| Topic 10           | electricity, power, warning, diesel, disaster, siren, areas, lives, without, outage                                    | 139              |
| Topic 11           | br, veghel, bob, upscaling, alarm, veldenweg, drunen, new, middle, large                                               | 17               |
| Topic 12           | vaccinated, vaccination, covid, corona, infections, pandemic, people, via, incidence, cases                            | 347              |
| Topic 13           | belgium, floods, liege, li, namur, meuse, dinant, water, flooding, city                                                | 389              |

|          |                                                                                                         |     |
|----------|---------------------------------------------------------------------------------------------------------|-----|
| Topic 14 | khuzestan, tigray, justice, people, defundaredes, liberenalos, freedom, kurdistan, iran, crime          | 225 |
| Topic 15 | samson, gesves, closed, towards, flooding                                                               | 8   |
| Topic 16 | hotton, tohogne, ardenne, roche, travel, direction, blocked, towards, flooding, accident                | 10  |
| Topic 17 | hertogenbosch, cooperation, found, injury, missing, police, transport, bbn, burgernet, accident         | 116 |
| Topic 18 | bless, god, amen, living, dead, lord, condolences, relatives, flees, crawls                             | 207 |
| Topic 19 | cuba, soscuba, venezuela, cuban, freedom, cubans, cubaesunadictadura, cambiodesistema, free, cubadecide | 121 |
| Topic 20 | ring, inner, accident, near, lane, outer, blocked, zellik, left, tervuren                               | 63  |
| Topic 21 | belgium, national, day, victims, mourning, solidarity, floods, silence, minute, netherlands             | 358 |
| Topic 22 | laschet, germany, merkel, chancellor, cdu, german, catastrophe, people, climate, nrw                    | 190 |
| Topic 23 | donations, help, donate, aid, flood, donation, thank, money, volunteers, distance                       | 245 |
| Topic 24 | neufch, teau, sunday, valjoly, sweets, wiese, nebach, mutt, saure, monday                               | 20  |
| Topic 25 | germany, flood, rhine, rain, heavy, water, erftstadt, nrw, cologne, wuppertal                           | 460 |
| Topic 26 | water, basement, high, see, damage, flooded, dry, photo, house, cellar                                  | 301 |
| Topic 27 | fire, leverkusen, explosion, brigade, bait, dog, poison, waste, operation, friesland                    | 201 |
| Topic 28 | flood, rain, floods, water, weather, flooding, storm, heavy, flooded, like                              | 540 |
| Topic 29 | direction, near, lummen, blocked, accident, lane, brussels, closed, ranst, stop                         | 235 |
| Topic 30 | good, strength, thank, family, luck, everyone, keep, people, fingers, thanks                            | 369 |

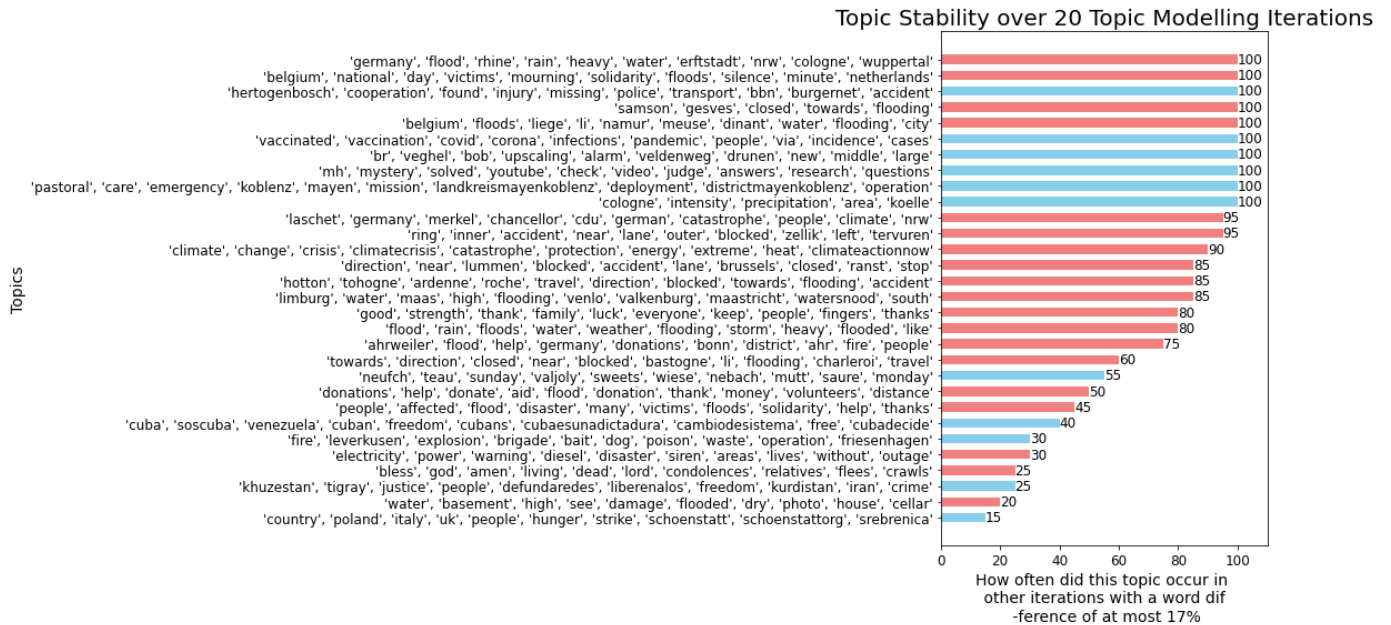

5 **Figure S1. Topic stability in percent of all iteration, for the topics in the iteration with the most stable topics. The percentages indicate across how many iterations this topic emerged with a maximum difference of 17%. The red bars depict the topics selected for further analysis.**

| Topic occurrence frequency | All (N) | Dominant (N) | Discarded (%) |
|----------------------------|---------|--------------|---------------|
| 1                          | 2523    | 996          | 61            |
| 2                          | 555     | 319          | 43            |
| 3                          | 158     | 101          | 36            |
| 4                          | 99      | 65           | 34            |
| 5                          | 48      | 33           | 31            |
| 6                          | 26      | 14           | 46            |
| 7                          | 25      | 22           | 12            |
| 8                          | 10      | 8            | 20            |
| 9                          | 8       | 6            | 25            |
| 10                         | 4       | 3            | 25            |
| 11                         | 3       | 3            | 0             |
| 12                         | 5       | 5            | 0             |
| 13                         | 1       | 1            | 0             |
| 14                         | 5       | 5            | 0             |

|    |   |   |   |
|----|---|---|---|
| 15 | 2 | 2 | 0 |
| 17 | 2 | 2 | 0 |
| 18 | 1 | 1 | 0 |
| 19 | 1 | 1 | 0 |
| 21 | 1 | 1 | 0 |
| 22 | 2 | 2 | 0 |
| 23 | 2 | 2 | 0 |
| 35 | 1 | 1 | 0 |

10 Table S2. Summary table showing the distribution of daily topics per watershed based on their value of occurrence frequency. ‘All’ represents the total number of topics detected for a given occurrence frequency, while ‘Dominant’ refers to the number of topics retained after filtering. ‘Discarded’ indicates the proportion of topics at each frequency that were excluded from the analysis. Figures represent summary values for the entire study period and area. Topics that were less frequently discussed were primarily affected by the filtering process (e.g., 61% of topics mentioned only once on a given day and watershed were discarded). In contrast, the most frequently discussed topics (i.e. those occurring between 11 and 35 times) were retained in the analysis.

|                       | Escaut |          | Meuse |          | Rhine |          | Study area |          |               |
|-----------------------|--------|----------|-------|----------|-------|----------|------------|----------|---------------|
|                       | All    | Dominant | All   | Dominant | All   | Dominant | All        | Dominant | Discarded (%) |
| Heavy Rain            | 74     | 26       | 163   | 58       | 156   | 61       | 393        | 145      | 63.1          |
| Roads Blocked         | 95     | 61       | 209   | 168      | 18    | 13       | 322        | 242      | 24.8          |
| Meuse Flood           | 93     | 39       | 338   | 232      | 49    | 15       | 480        | 286      | 40.4          |
| Rhine Flood           | 20     | 1        | 95    | 33       | 358   | 208      | 473        | 242      | 48.8          |
| Damages               | 37     | 12       | 115   | 38       | 146   | 53       | 298        | 103      | 65.4          |
| Help to Victims       | 76     | 30       | 155   | 50       | 180   | 59       | 411        | 139      | 66.2          |
| Volunteering          | 29     | 5        | 62    | 21       | 89    | 26       | 180        | 52       | 71.1          |
| Compassion            | 55     | 16       | 157   | 71       | 181   | 81       | 393        | 168      | 57.3          |
| National Victim's Day | 85     | 40       | 114   | 59       | 18    | 4        | 217        | 103      | 52.5          |
| German Politics       | 12     | 3        | 30    | 5        | 96    | 36       | 138        | 44       | 68.1          |
| Climate Crisis        | 33     | 8        | 59    | 28       | 85    | 33       | 177        | 69       | 61.0          |

15 Table S3. Total number of Tweet occurrences for each topic category per main river basin (Escaut, Meuse, Rhine) and across the study area before and after the selection of dominant topics. The initial number of occurrences is detailed in the first column (‘All’), while the number of dominant topics retained after filtering is provided in the second column (‘Dominant’). ‘Discarded (%)’ indicates the proportion of topics excluded from the analysis after selecting dominant topics. At the river basin level, the number of dominant topics is sometimes low, with less than 10 daily occurrences per watershed. However, at the study area level, all topics are  
20 well represented, with occurrences ranging from 44 (for German Politics) to 286 (for Meuse Flood). The filtering process impacted topics to a relatively similar degree, with the proportion of discarded topics ranging from 40% to 70%, except for Roads Blocked, for which only 24.8% of occurrences were filtered out.

## Flood characteristics

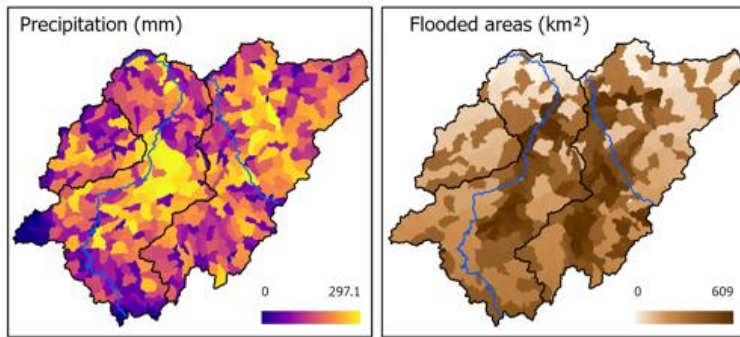

## Watershed characteristics

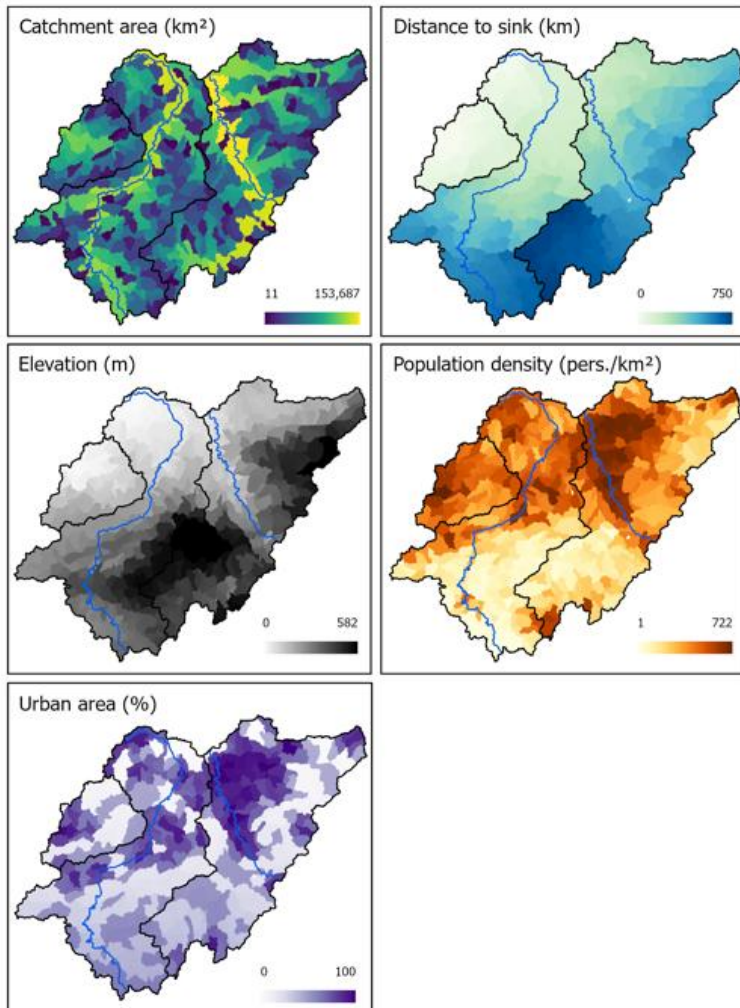

25 **Figure S2.** Map of variables analysed to describe the flood and watershed characteristics across three main river basins (Escaut, Meuse, and Rhine). Variables are classified using a quantile method (100 classes).

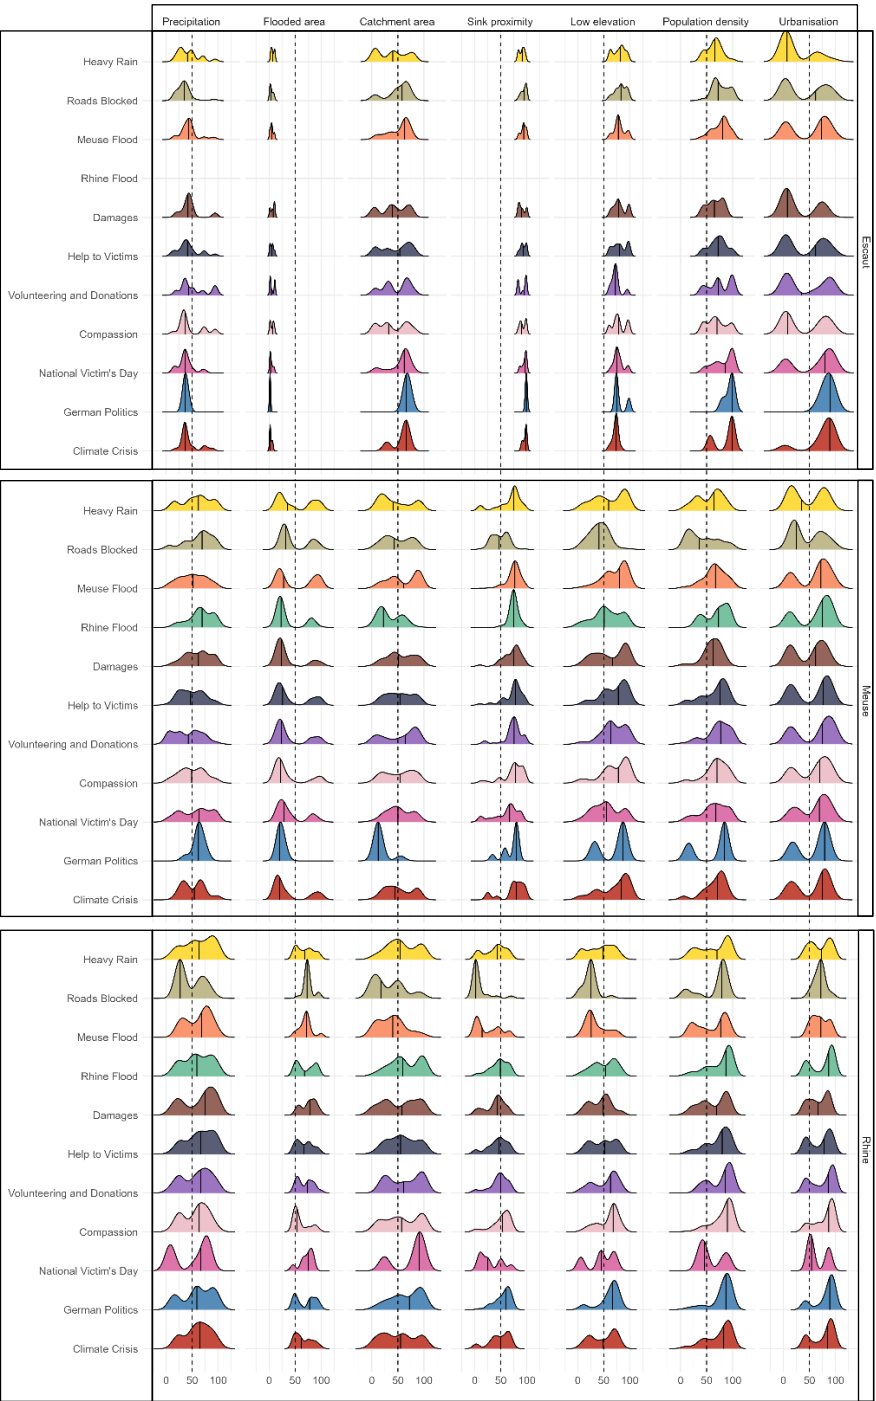

**Figure S3. Distribution plots of dominant topic occurrences per main river basin based on flood and watershed characteristics. Topics from the Escaut river basin, as well as the *German Politics* of the Meuse river basin and *National Victim's Day* of the Rhine river basin, should be interpreted with caution due to their limited frequency (fewer than 10 occurrences – See Table S2).**
